# Supplementary material for: Wheat Metabolite Interferences on Fluorescent Pseudomonas Physiology Modify Wheat Metabolome through an Ecological Feedback
Source: MDPI journal article supplement (doi:10.3390/metabo12030236), 2022-03-09
Supplement: s1 [file s1]

**Table S3. List of 15 the chemical standards used in UHPLC-DAD-qTOF analyses**

| N° | Name                               | Molecular formula                                                            | Origin                          | Purity |
|----|------------------------------------|------------------------------------------------------------------------------|---------------------------------|--------|
| 1  | Monoacetylphloroglucinol           | C <sub>8</sub> H <sub>8</sub> O <sub>4</sub>                                 | Cayman Chemical                 | ≥98%   |
| 2  | 2,4-diacetylphloroglucinol         | C <sub>10</sub> H <sub>10</sub> O <sub>5</sub>                               | Toronto Research Chemicals Inc. | ≥98%   |
| 3  | Pyrrolnitrin                       | C <sub>10</sub> H <sub>6</sub> Cl <sub>2</sub> N <sub>2</sub> O <sub>2</sub> | SIGMA Chemical Co.              | ≥98%   |
| 4  | Phenazine-1-carboxylic acid        | C <sub>13</sub> H <sub>8</sub> N <sub>2</sub> O <sub>2</sub>                 | Toronto Research Chemicals Inc. | ≥98%   |
| 5  | 3-OH-C6-HSL                        | C <sub>10</sub> H <sub>17</sub> NO <sub>4</sub>                              | SIGMA Chemical Co.              | ≥98%   |
| 6  | Dimethyl 2,6-pyridinedicarboxylate | C <sub>9</sub> H <sub>9</sub> NO <sub>4</sub>                                | SIGMA Chemical Co.              | ≥98%   |
| 7  | Indole-acetic-acid                 | C <sub>10</sub> H <sub>9</sub> NO <sub>2</sub>                               | SIGMA Chemical Co.              | ≥98%   |
| 8  | Tryptophan                         | C <sub>11</sub> H <sub>12</sub> N <sub>2</sub> O <sub>2</sub>                | SIGMA Chemical Co.              | ≥98%   |
| 9  | Phenylalanin                       | C <sub>9</sub> H <sub>11</sub> NO <sub>2</sub>                               | SIGMA Chemical Co.              | ≥98%   |
| 10 | Fumaric acid                       | C <sub>4</sub> H <sub>4</sub> O <sub>4</sub>                                 | SIGMA Chemical Co.              | ≥98%   |
| 12 | Caffeic acid                       | C <sub>9</sub> H <sub>8</sub> O <sub>4</sub>                                 | SIGMA Chemical Co.              | ≥98%   |
| 13 | Succinic acid                      | C <sub>4</sub> H <sub>6</sub> O <sub>4</sub>                                 | SIGMA Chemical Co.              | ≥98%   |
| 14 | DIBOA-Glc                          | C <sub>14</sub> H <sub>17</sub> NO <sub>9</sub>                              | -                               | -      |
| 15 | MBOA                               | C <sub>8</sub> H <sub>7</sub> NO <sub>3</sub>                                | SIGMA Chemical Co.              | ≥98%   |
