# Supplementary material for: Wheat Metabolite Interferences on Fluorescent Pseudomonas Physiology Modify Wheat Metabolome through an Ecological Feedback
Source: MDPI journal article supplement (doi:10.3390/metabo12030236), 2022-03-09
Supplement: s1 [file s1]

**Table S1. Parameter settings used for metabolomics data processing of *Pseudomonas* extract and wheat root samples**

| Step                                                       | Method   | Parameters | Values wheat root samples | Values <i>Pseudomonas</i> strains culture samples |
|------------------------------------------------------------|----------|------------|---------------------------|---------------------------------------------------|
| <b>Peak detection<br/>(<i>Peakpicking</i>)<sup>a</sup></b> | centWave | ppm        | 10                        | 10                                                |
|                                                            |          | mzdiff     | 0.05                      | 0.05                                              |
|                                                            |          | prefilter  | 3, 2500                   | 3, 5000                                           |
|                                                            |          | snthresh   | 10                        | 10                                                |
|                                                            |          | peakwidth  | 4, 15                     | 4, 15                                             |
|                                                            |          | noise      | 5000                      | 10000                                             |
| <b>Peak grouping<br/>(<i>group</i>)<sup>a</sup></b>        | density  | bw         | 4                         | 3                                                 |
|                                                            |          | mzwid      | 0.25                      | 0.25                                              |
|                                                            |          | minfrac    | 0.05                      | 0.01                                              |
| <b>FillPeaks</b>                                           | chrom    |            |                           |                                                   |

<sup>a</sup> data processed with xcms R-package on collaborative Galaxy platform "Workflow4metabolomics" version 3.3
